# Supplementary material for: Effects of upscaling temporal resolution of groundwater flow and transport boundary conditions on the performance of nitrate-transport models at the regional management scale
Source: Springer Nature journal article supplement (doi:10.1007/s10040-020-02133-x), 2020-03-18
Supplement: MOESM1 [file 17813092]

## Effects of upscaling temporal resolution of groundwater flow and transport boundary conditions on the performance of nitrate-transport models at the regional management scale

Mehrdad Bastani <sup>a,\*</sup>, Thomas Harter <sup>b</sup>

<sup>a</sup> Department of Civil and Environmental Engineering, University of California Davis

<sup>b</sup> Department of Land, Air, and Water Resources, University of California Davis

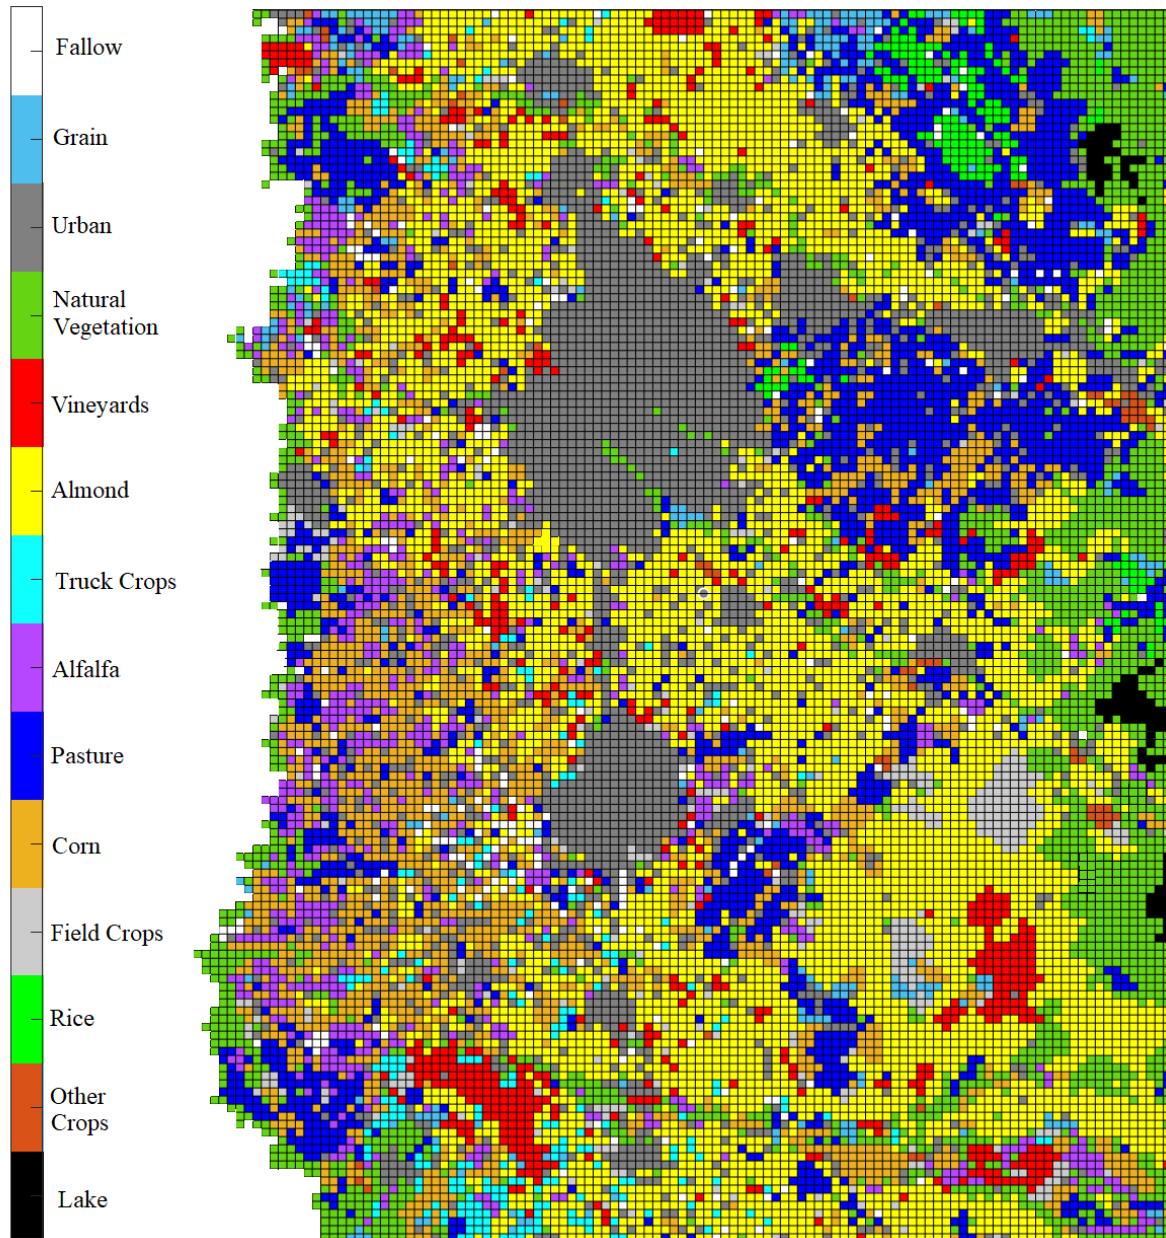

\* Corresponding author. E-mail address: bastani.mehrdad@gmail.com

Fig. S1: Distribution of agricultural land use in the study area in December 2004 (Phillips et al., 2015)

**ESM Reference**

Phillips, S.P., Rewis, D.L., and Traum, J.A. (2015) “Hydrologic model of the Modesto Region, California, 1960–2004”, U.S. Geological Survey Scientific Investigations Report, 2015–5045, 69 p., <http://dx.doi.org/10.3133/sir20155045>.
